# Supplementary material
Source: PubMed Central journal article supplement (PMC1693817)

(A)

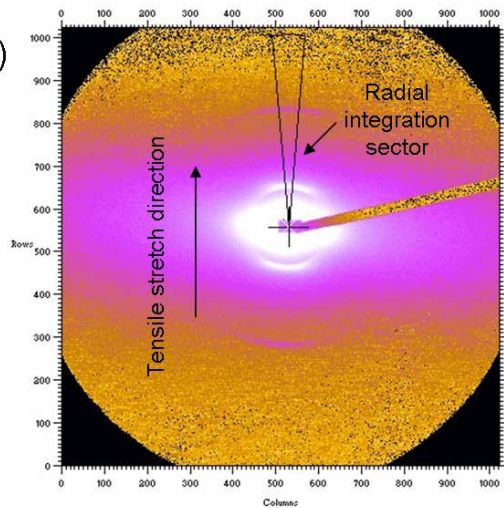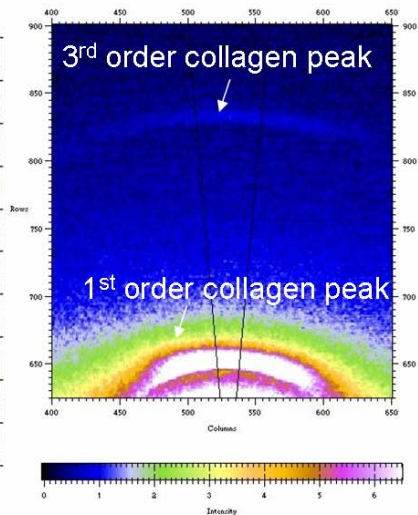

(B)

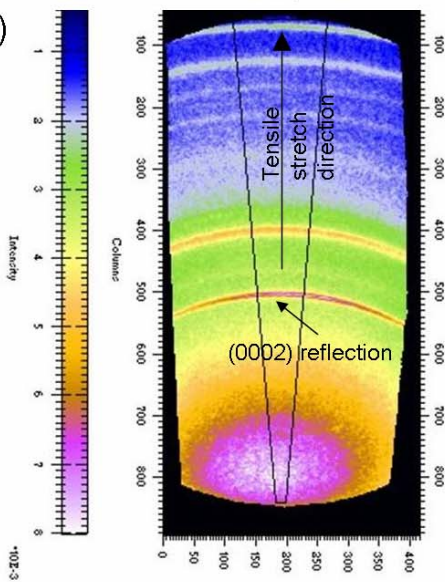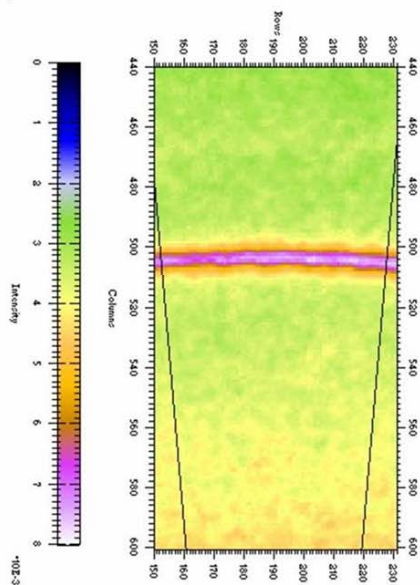

Supplement: pnas_0604237103_2.pdf [file pnas_0604237103_2.pdf]

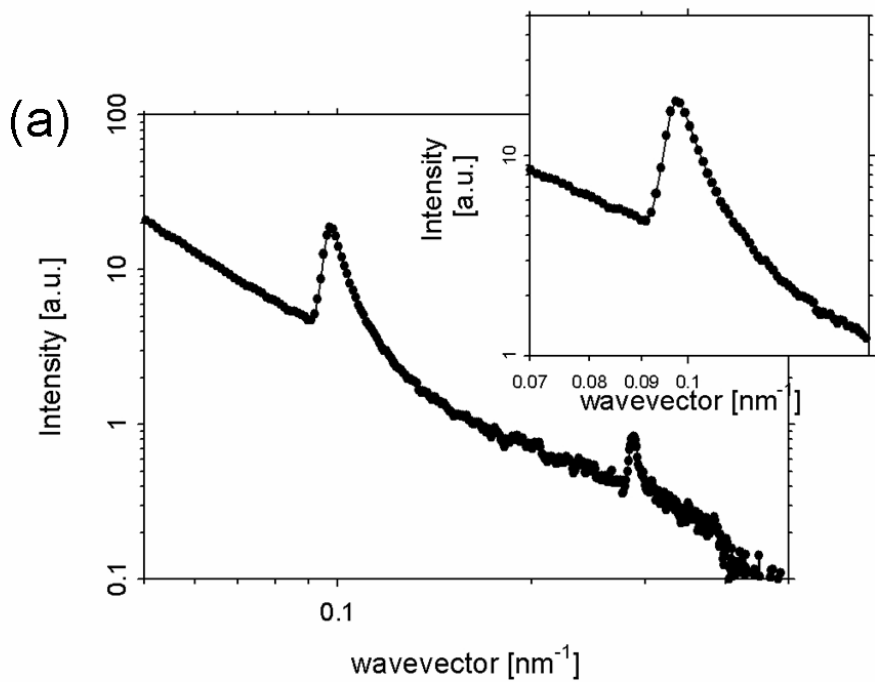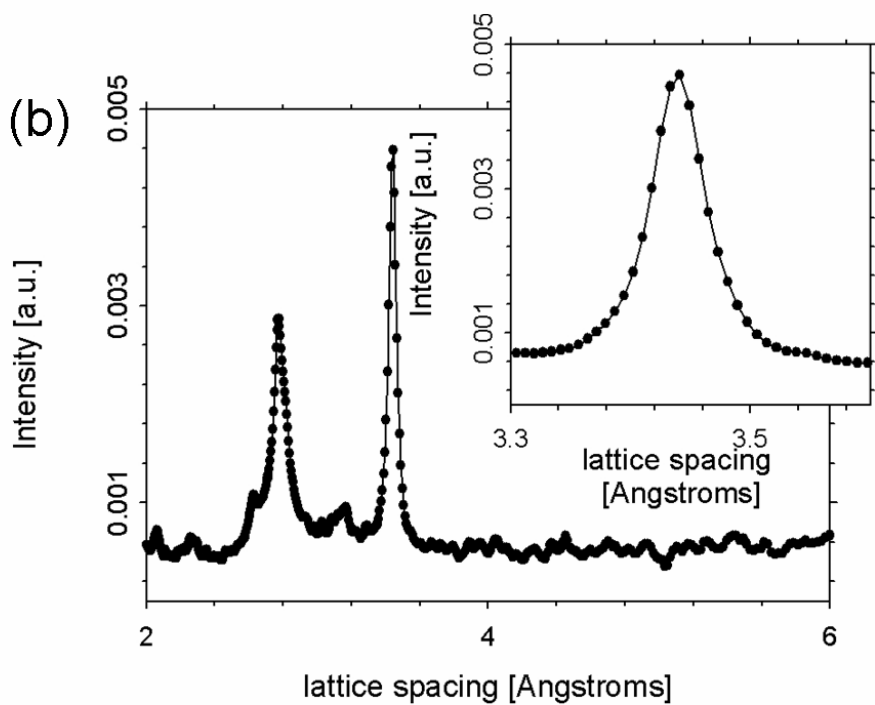

Supplement: pnas_0604237103_3.pdf [file pnas_0604237103_3.pdf]

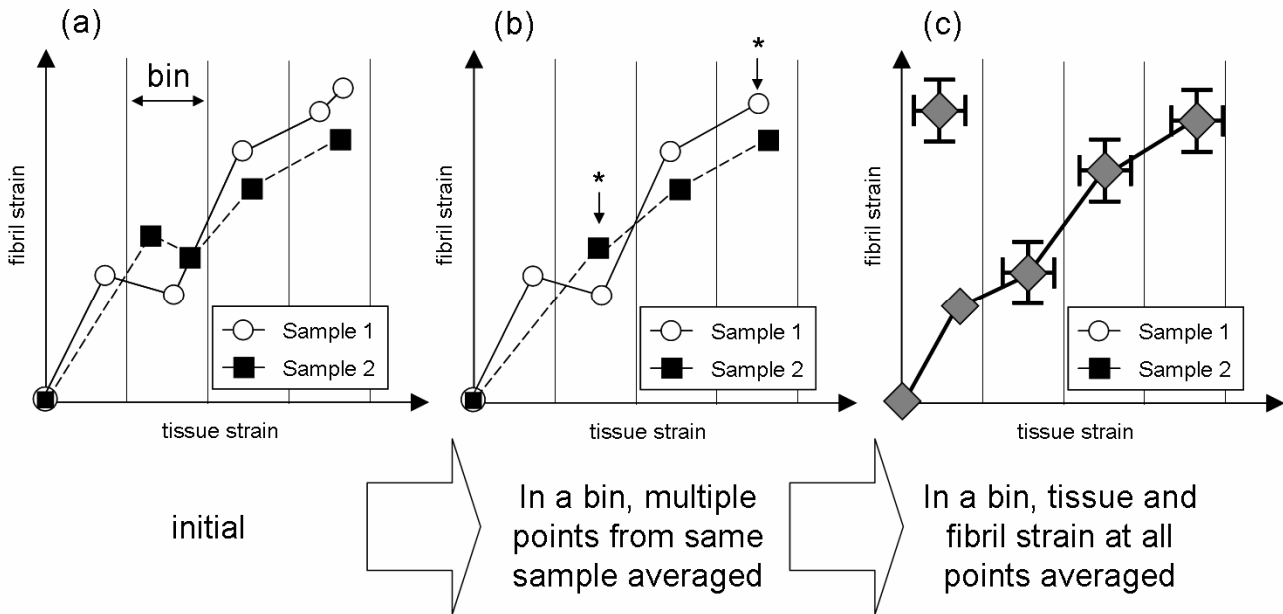

Supplement: pnas_0604237103_4.pdf [file pnas_0604237103_4.pdf]

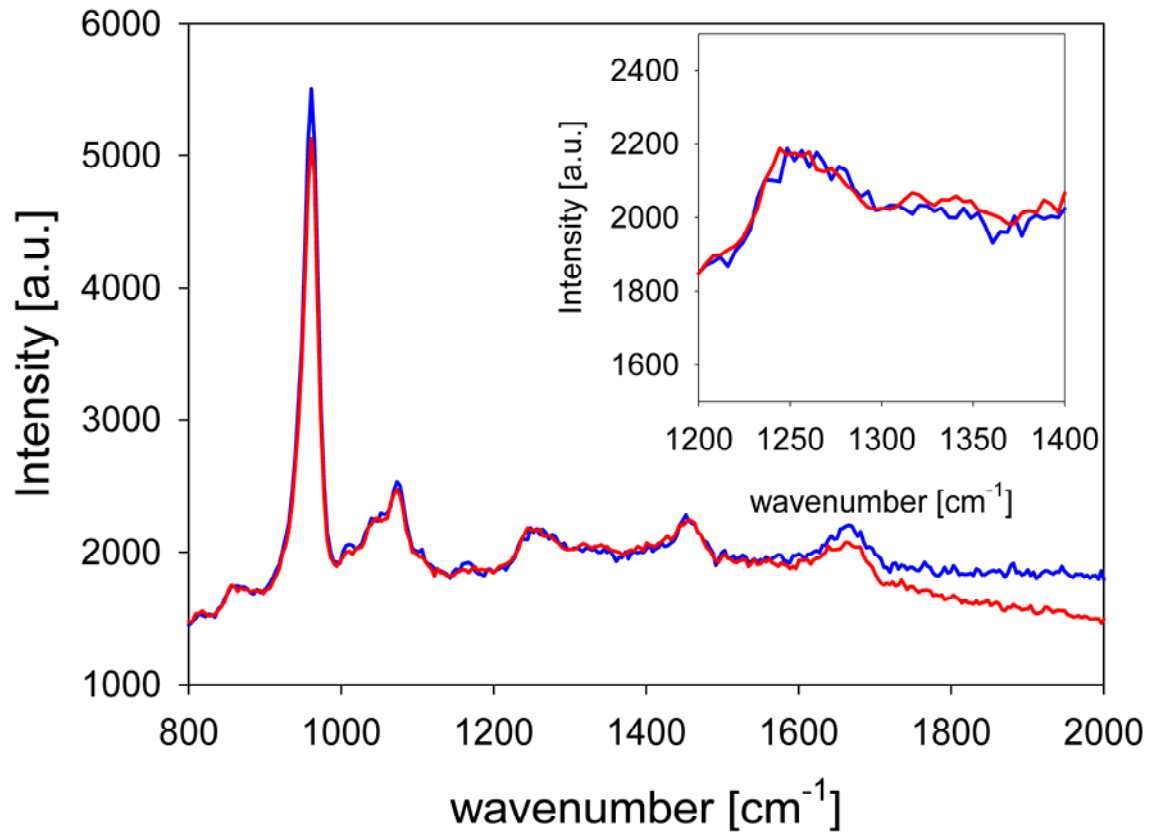

Supplement: pnas_0604237103_5.pdf [file pnas_0604237103_5.pdf]

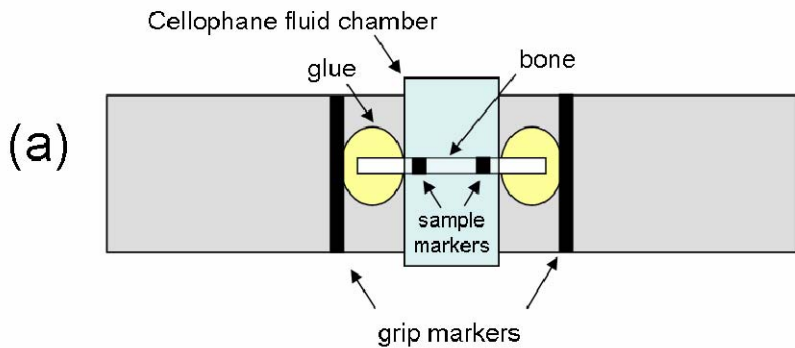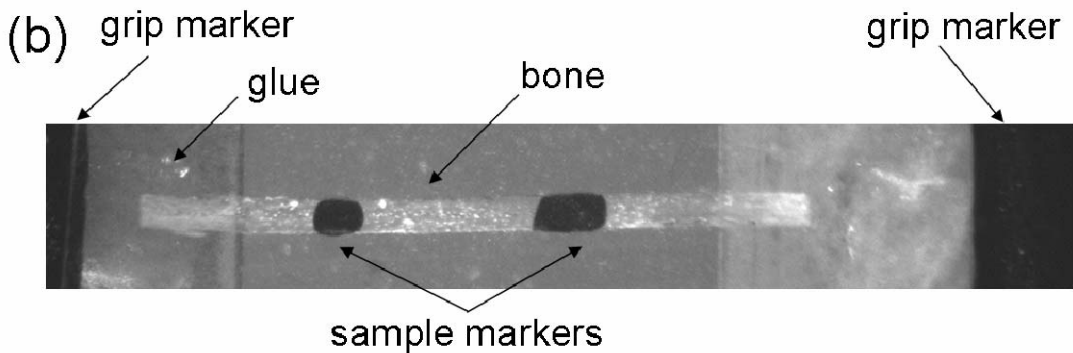

Supplement: pnas_0604237103_6.pdf [file pnas_0604237103_6.pdf]

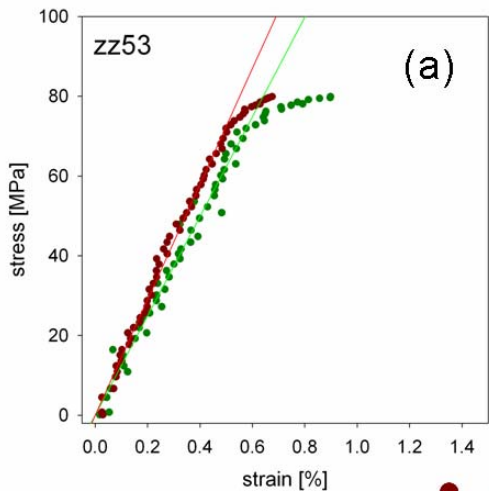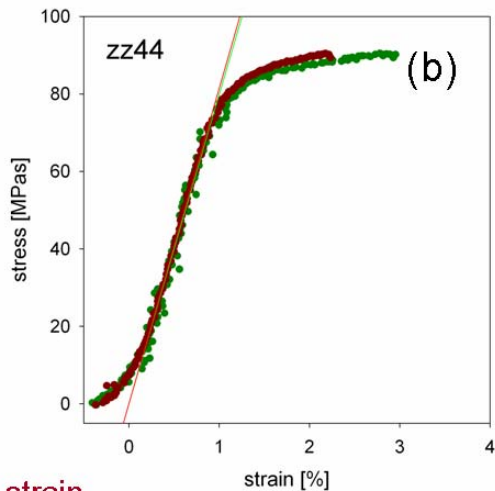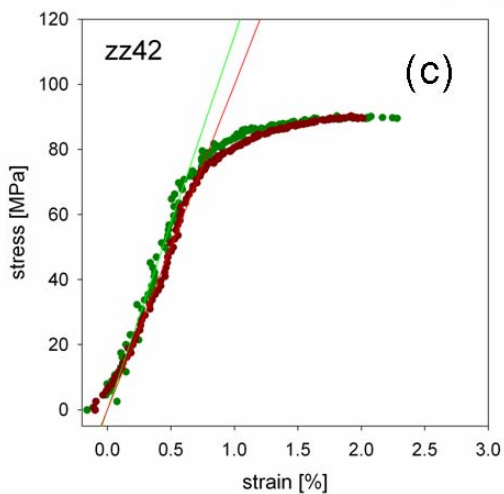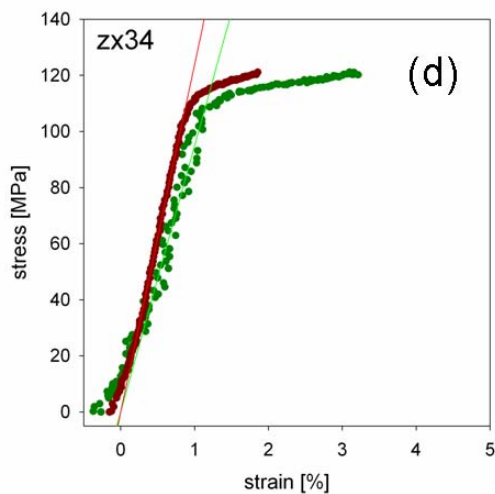

Supplement: pnas_0604237103_7.pdf [file pnas_0604237103_7.pdf]
